# Supplementary material
Source: Springer Nature journal article supplement (https://www.springermedizin.de/resource/supplementary/12904_2008_52_MOESM4_ESM.pdf/9518016)
Supplement: MOESM4 [file 9518016]

Table 4: Relation between the administration of opiates and the other indicators of palliative care, per type of LTC

|                   | <b>NH</b>        |      |                  |       | <b>HHS</b>       |      |                  |       |
|-------------------|------------------|------|------------------|-------|------------------|------|------------------|-------|
|                   | <b>Opiates +</b> |      | <b>Opiates -</b> |       | <b>Opiates +</b> |      | <b>Opiates -</b> |       |
|                   | N                | %    | N                | %     | N                | %    | N                | %     |
| <b>Late care</b>  |                  |      |                  |       |                  |      |                  |       |
| SPCS              | 19               | 5.0  | 2                | 0.9*  | 38               | 39.6 | 10               | 5.0** |
| Pain scale        | 95               | 25.1 | 16               | 7.5** | 34               | 37.4 | 2                | 1.0** |
| Any symptom scale | 57               | 15.1 | 6                | 2.9** | 26               | 28.9 | 11               | 5.6** |
| <b>Early care</b> |                  |      |                  |       |                  |      |                  |       |
| SPCS              | 26               | 18.1 | 11               | 2.7** | 35               | 37.2 | 15               | 5.3** |
| Pain scale        | 54               | 37.0 | 20               | 4.9** | 31               | 35.2 | 5                | 1.7** |
| Any symptom scale | 20               | 13.9 | 22               | 5.3*  | 21               | 25.0 | 11               | 3.9** |

\*= <0.05, \*\* = <0.001

°=nursing homes

°°=home health services
